# Supplementary material for: Tug-of-War Driven by the Structure of Carboxylic Acids: Tuning the Size, Morphology, and Photocatalytic Activity of α-Ag2WO4
Source: MDPI journal article supplement (doi:10.3390/nano12193316), 2022-09-23
Supplement: s1 [file s1]

# Tug-of-War Driven by the Structure of Carboxylic Acids: Tuning the Size, Morphology, and Photocatalytic Activity of $\alpha$ -Ag<sub>2</sub>WO<sub>4</sub>

Lara Kelly Ribeiro <sup>1,2,3,†</sup>, Amanda Fernandes Gouveia <sup>3,†</sup>, Francisco das Chagas M. Silva <sup>1</sup>, Luís F. G. Noleto <sup>1</sup>, Marcelo Assis <sup>2,3</sup>, André M. Batista <sup>4</sup>, Laécio S. Cavalcante <sup>5</sup>, Eva Guillamón <sup>3</sup>, Ieda L. V. Rosa <sup>2</sup>, Elson Longo <sup>2</sup>, Juan Andrés <sup>3,\*</sup> and Geraldo E. Luz Júnior <sup>1,4</sup>

<sup>1</sup> Postgraduate Program in Chemistry, Department of Chemistry, Federal University of Piauí, 64049-550, Brazil

<sup>2</sup> LIEC/CDMF, Department of Chemistry, Federal University of São Carlos, P.O. Box 676, 13565-905, Brazil

<sup>3</sup> Department of Physical and Analytical Chemistry, University Jaume I (UJI), 12071 Castellon de La Plana, Spain

<sup>4</sup> Postgraduate Program in Nanoscience in Advanced Materials, Department of Chemistry, Federal University of ABC, 09210-580, Brazil

<sup>5</sup> Postgraduate Program in Chemistry, Department of Chemistry, State University of Piauí, P.O. Box 381, 64002-150, Brazil

\* Correspondence: andres@qfa.uji.es; Tel.: +34-669-36-94-11

† The authors contributed equally to this work.

## SM-1 Characterization

The crystalline phase of the samples was evaluated by X-ray diffraction (XRD) using a D/Max-2500PC diffractometer (Rigaku, Japan) with Cu K $\alpha$  radiation ( $\lambda = 0.154184$  nm), at a diffraction angle  $2\theta$  ranging from  $10^\circ$  to  $110^\circ$  and a scanning step of  $0.02^\circ/\text{min}$ . The experimental lattice parameters, unit cell volumes and atomic positions were calculated with the aid of GSAS program. For the analysis of the atomic compositions, X-ray photoelectron spectroscopy (XPS) was performed on a Thermo Fischer Scientific spectrometer model K-alpha+. Monochromatic Al K $\alpha$  radiation was used as an excitation source. Energy steps of 0.5 and 0.05 eV were used for survey and high-resolution spectra, respectively. The binding energies in all spectra were calibrated in reference to the C 1s peak (284.8 eV). The W 4f, Ag 3d, and O 1s core levels were measured in high-resolution mode. CasaXPS1 software was used to analyze the XPS spectra, in which the core-level signals were individually fitted with Gaussian-Lorentzian functions and background subtraction according to the Shirley method. Measurements of micro-Raman (MR) spectrum were collected on a T6400 spectrometer (HoribaJobin-Yvon) coupled to a CCD Synapse detector equipped with an argon-ion laser of 514 nm operating at 7 mW. These spectra were obtained over wavenumbers ranging from  $50\text{ cm}^{-1}$  to  $1100\text{ cm}^{-1}$ . Fourier-transform infrared spectroscopy (FTIR) was performed using a Jasco FT/IR-6200 spectrophotometer (Japan) operating in absorbance mode at room temperature. The spectra were collected in the range of  $200\text{--}900\text{ cm}^{-1}$ . The optical properties of the samples were investigated through measurements of ultraviolet-visible (UV-Vis) spectroscopy. The value of optical energy band gap ( $E_{\text{gap}}$ ) was calculated using the Kubelka and Munk-Aussig method from transmittance measurements taken on a Shimadzu spectrophotometer (model UV2600). The shapes and sizes of the samples were observed with a field emission scanning electron microscope (FE-SEM) operating at 5–10 kV (Supra 35-VP, Carl Zeiss). Transmission electron microscopy (TEM) images were obtained on a Jeol JEM-2100F operating at 200 kV.

## SM-2 Diffractograms of the $\alpha$ - $\text{Ag}_2\text{WO}_4$ samples

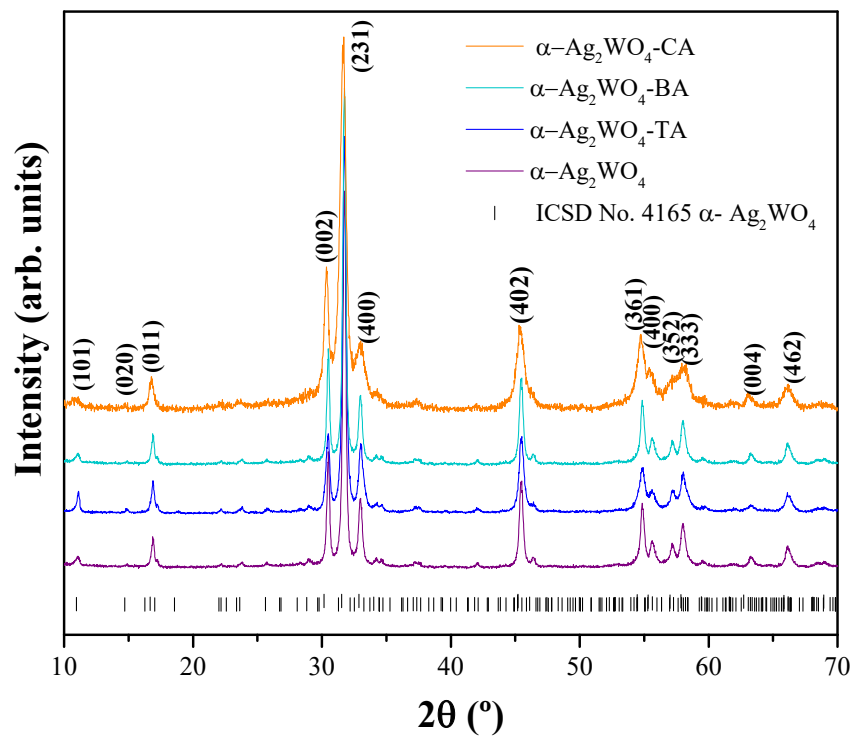

**Figure S1.** XRD patterns of  $\alpha$ - $\text{Ag}_2\text{WO}_4$ ,  $\alpha$ - $\text{Ag}_2\text{WO}_4$ -TA,  $\alpha$ - $\text{Ag}_2\text{WO}_4$ -BA, and  $\alpha$ - $\text{Ag}_2\text{WO}_4$ -CA samples. The vertical lines indicate the respective positions found on the  $\alpha$ - $\text{Ag}_2\text{WO}_4$  ICSD card 4165.

## SM-3 Rietveld refinement plot of $\alpha$ - $\text{Ag}_2\text{WO}_4$ samples

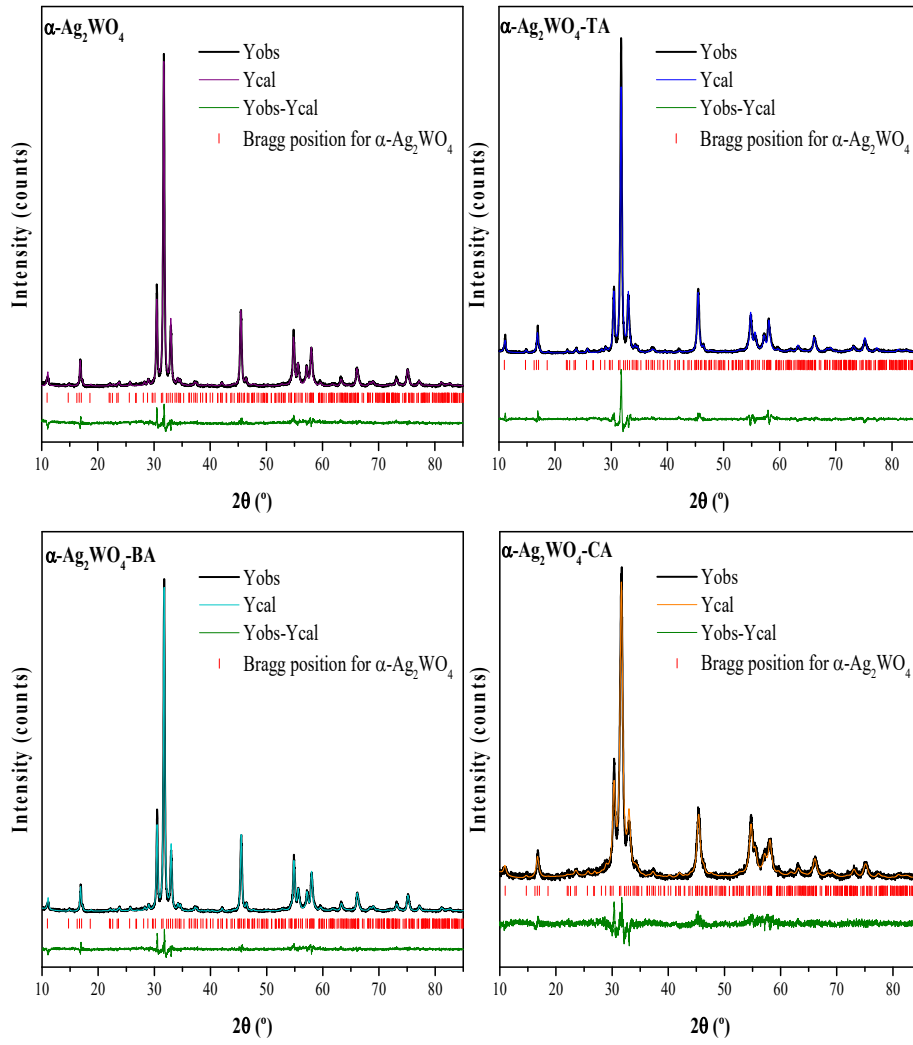

**Figure S2.** Rietveld refinements of the  $\alpha$ - $\text{Ag}_2\text{WO}_4$ ,  $\alpha$ - $\text{Ag}_2\text{WO}_4$ -TA,  $\alpha$ - $\text{Ag}_2\text{WO}_4$ -BA, and  $\alpha$ - $\text{Ag}_2\text{WO}_4$ -CA samples.

**Table S1.** Lattice parameters (a, b, c) and unit cell volume (V) with their standard deviation, and statistical parameters of quality obtained by Rietveld refinement for  $\alpha$ - $\text{Ag}_2\text{WO}_4$ ,  $\alpha$ - $\text{Ag}_2\text{WO}_4$ -TA,  $\alpha$ - $\text{Ag}_2\text{WO}_4$ -BA, and  $\alpha$ - $\text{Ag}_2\text{WO}_4$ -CA samples.  $R_{\text{wp}}$ : weighted profile factor,  $R_p$ : profile factor,  $R_{\text{Bragg}}$ : Bragg factor,  $\chi^2$ : reduced chi-square.

| Samples                                 | a (Å)         | b (Å)         | c (Å)        | V (Å <sup>3</sup> ) | $R_{\text{wp}}$ (%) | $R_p$ (%) | $R_{\text{Bragg}}$ (%) | $\chi^2$ |
|-----------------------------------------|---------------|---------------|--------------|---------------------|---------------------|-----------|------------------------|----------|
| $\alpha$ - $\text{Ag}_2\text{WO}_4$     | 10.90346 (43) | 12.01760 (54) | 5.88866 (22) | 771.611 (33)        | 11.10               | 8.41      | 6.78                   | 2.249    |
| $\alpha$ - $\text{Ag}_2\text{WO}_4$ -TA | 10.90170 (38) | 12.01563 (48) | 5.88766 (19) | 771.229 (29)        | 9.80                | 7.49      | 8.45                   | 1.755    |

|                                               |               |               |              |              |       |       |      |       |
|-----------------------------------------------|---------------|---------------|--------------|--------------|-------|-------|------|-------|
| $\alpha$ -Ag <sub>2</sub> WO <sub>4</sub> -BA | 10.89220 (62) | 12.02236 (78) | 5.89549 (32) | 772.014 (49) | 14.56 | 11.33 | 5.98 | 2.686 |
| $\alpha$ -Ag <sub>2</sub> WO <sub>4</sub> -CA | 10.86179 (48) | 12.02843 (15) | 5.89618 (83) | 770.337 (71) | 12.08 | 9.40  | 7.64 | 1.716 |
| ICSD-4165                                     | 10.892        | 12.032        | 5.922        | 775.560      | —     | —     | —    | —     |

#### SM-4 Raman and FTIR spectroscopy of $\alpha$ -Ag<sub>2</sub>WO<sub>4</sub> samples

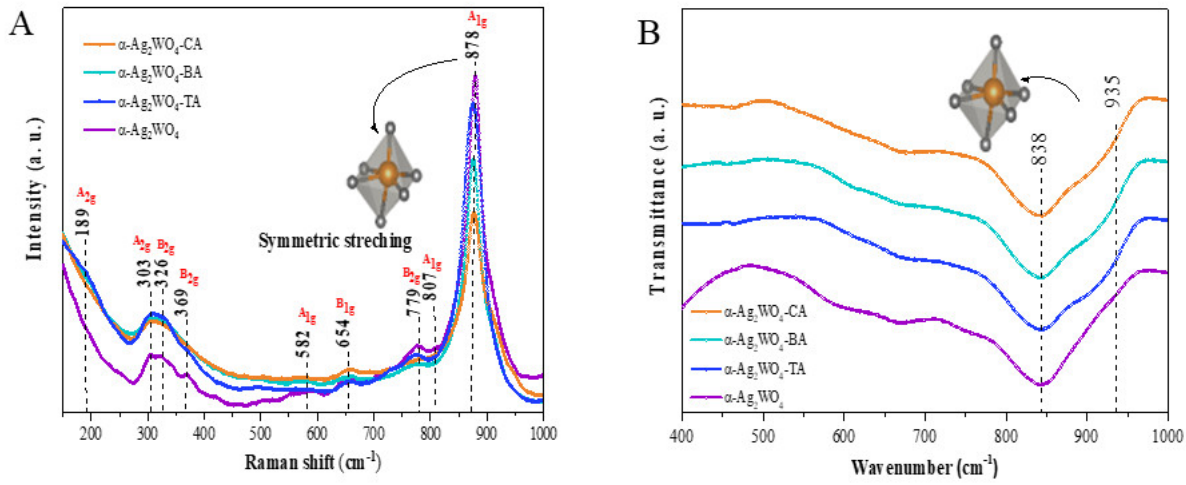

**Figure S3.** Raman spectroscopy of samples. The vertical dashed lines indicate the position of the Raman peaks and active modes (A). FTIR spectra of samples. The vertical lines indicate the relative positions of the infrared-active modes (B).

## SM-5 XPS: The survey spectra of the $\alpha$ -Ag<sub>2</sub>WO<sub>4</sub> samples

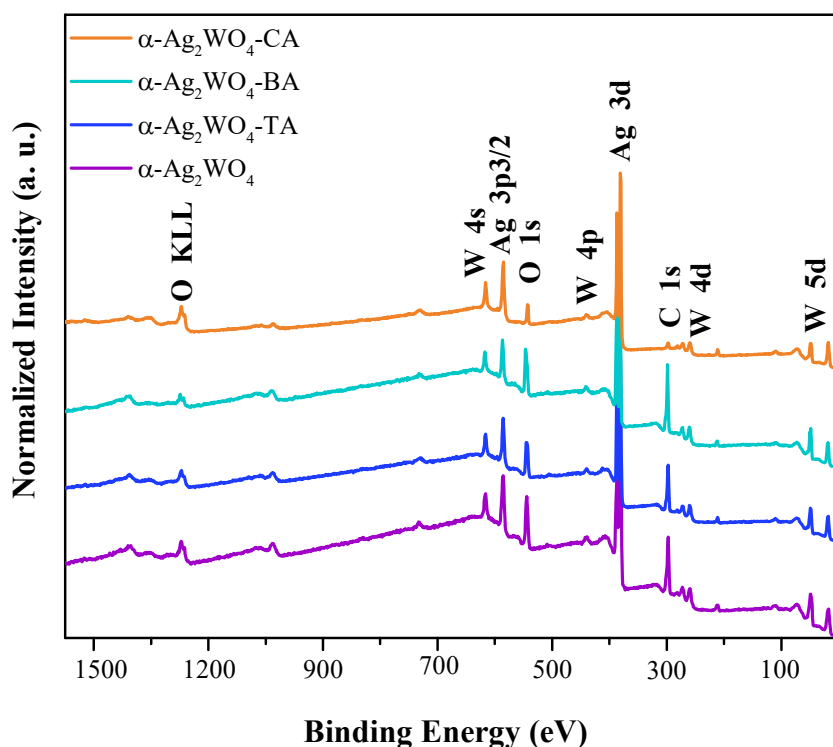

**Figure S4.** XPS spectra of the samples of  $\alpha$ -Ag<sub>2</sub>WO<sub>4</sub>,  $\alpha$ -Ag<sub>2</sub>WO<sub>4</sub>-TA,  $\alpha$ -Ag<sub>2</sub>WO<sub>4</sub>-BA, and  $\alpha$ -Ag<sub>2</sub>WO<sub>4</sub>-CA.

The XPS spectra of the Ag species of the  $\alpha$ -Ag<sub>2</sub>WO<sub>4</sub> samples show two bands located between ~368 and ~374 eV, which can be attributed to the binding energies of Ag 3d<sub>5/2</sub> and 3d<sub>3/2</sub>, respectively. **Figure S5(A-B)** shows that the Ag 3d spectra were better fitted into two separate components for the  $\alpha$ -Ag<sub>2</sub>WO<sub>4</sub> and  $\alpha$ -Ag<sub>2</sub>WO<sub>4</sub>-TA samples, which means that different Ag oxidation states are present in these samples. High intensity peaks, approximately around 368 eV and 374 eV related to the 3d<sub>5/2</sub> and 3d<sub>3/2</sub> orbitals, respectively, are related to the binding energy of Ag<sup>+</sup>. The lower intensity peaks related to the 3d<sub>5/2</sub> and 3d<sub>3/2</sub> orbitals, obtained by fit, demonstrate the presence of Ag in the 0-oxidation state. In **Figure S5(C)** it shows that the Ag 3d spectra were better fitted using only one component around 367 eV and 374 eV related to the 3d<sub>5/2</sub> and 3d<sub>3/2</sub> orbitals, respectively, are related to the binding energy of Ag<sup>+</sup>, and reveal the presence of only Ag<sup>+</sup> in the  $\alpha$ -Ag<sub>2</sub>WO<sub>4</sub>-BA sample. **Figure S5(D)** shows that the Ag 3d spectra were best fitted using two components around 368 eV related to 3d<sub>5/2</sub> orbitals, and only one component around 374 related to 3d<sub>3/2</sub> orbitals. The results indicate that there is a small amount of Ag<sup>0</sup> in the sample.

The XPS spectra of the W species of  $\alpha$ -Ag<sub>2</sub>WO<sub>4</sub> are illustrated in **Figure S5(E-H)**. The spectra show two bands located between ~36 and ~34 eV, which can be attributed to W 4f<sub>7/2</sub> and 4f<sub>5/2</sub> binding energies, respectively, and a broad peak related to W 5p<sub>3/2</sub> located between 40.7 and 41.2 eV. The deconvoluted peak of W 4f can be adjusted into two peaks, corresponding to the typical binding energies of oxidation state W<sup>6+</sup> (centered at 37.0 and 34.8 eV). Additionally, other peaks can also be observed, corresponding to the typical binding energies of W<sup>5+</sup> (centered at 37.6 and 34.8 eV).

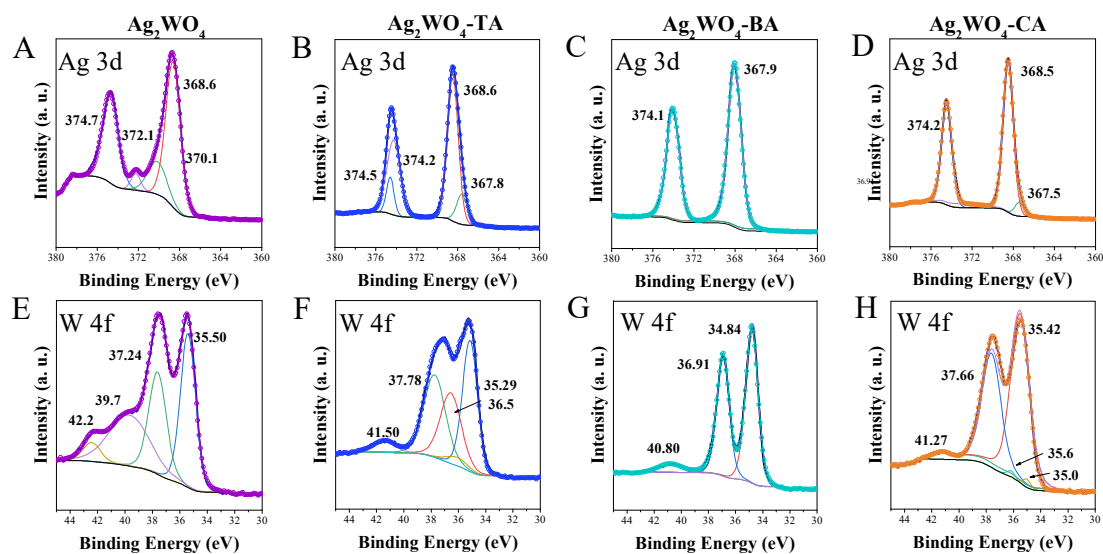

**Figure S5.** High-resolution XPS spectra of Ag 3d (A, B, C, and D) and W 4f (E, F, G, and H) orbitals.

## SM-6 UV-vis analysis of the $\alpha$ -Ag<sub>2</sub>WO<sub>4</sub> samples

The results of the UV-Vis diffuse reflectance spectra of the  $\alpha$ -Ag<sub>2</sub>WO<sub>4</sub> samples are shown in **Figure S6(A-D)**.

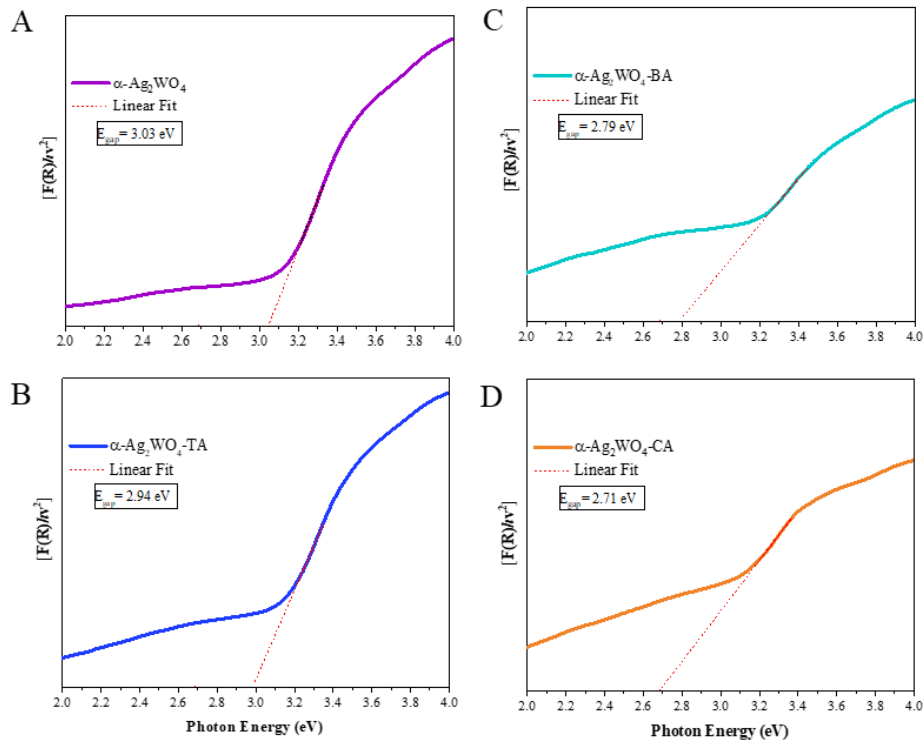

**Figure S6.** Determination of the  $E_{gap}$  values. Plots of transformed Kubelka-Munk function versus photon energy for  $\alpha$ -Ag<sub>2</sub>WO<sub>4</sub> (A),  $\alpha$ -Ag<sub>2</sub>WO<sub>4</sub>-TA (B),  $\alpha$ -Ag<sub>2</sub>WO<sub>4</sub>-BA (C), and  $\alpha$ -Ag<sub>2</sub>WO<sub>4</sub>-CA (D) samples.

The  $\alpha$ -Ag<sub>2</sub>WO<sub>4</sub>-based materials exhibit an optical absorption spectrum governed by direct electronic transitions between the valence and the conduction bands. The obtained  $E_{gap}$  values were 3.03, 2.94, 2.79, and 2.71 eV, for  $\alpha$ -Ag<sub>2</sub>WO<sub>4</sub>,  $\alpha$ -Ag<sub>2</sub>WO<sub>4</sub>-TA,  $\alpha$ -Ag<sub>2</sub>WO<sub>4</sub>-BA, and  $\alpha$ -Ag<sub>2</sub>WO<sub>4</sub>-CA, respectively.

## SM-7 Photocatalytic activity

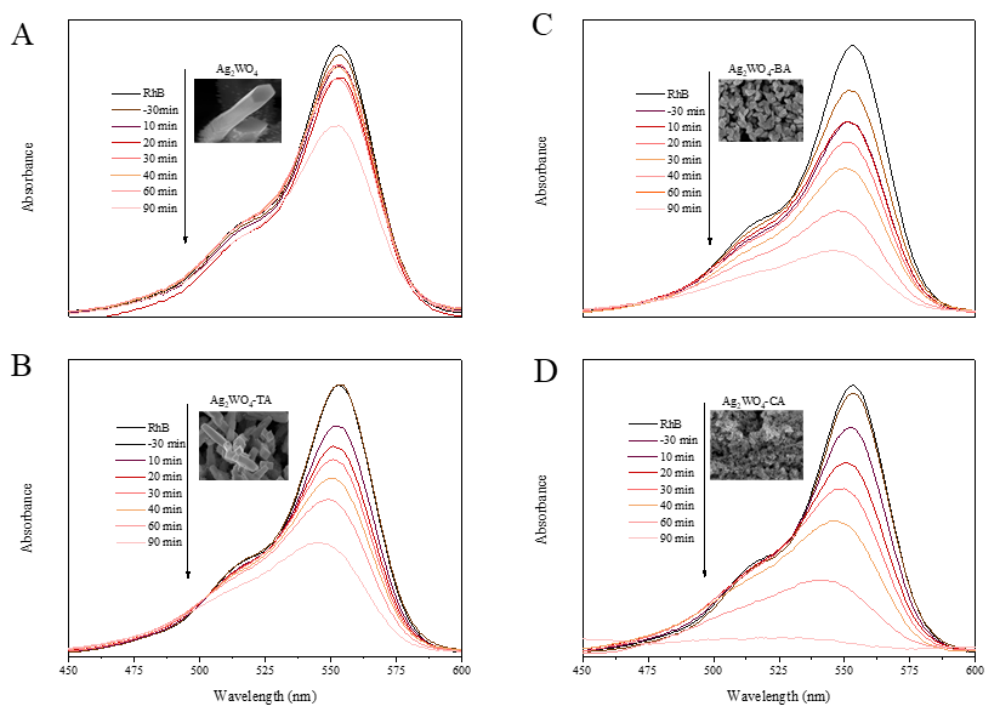

**Figure S7.** Evolution of UV-vis absorption spectra after 90 min of illumination for the degradation of RhB by the  $\alpha$ - $\text{Ag}_2\text{WO}_4$  (A),  $\alpha$ - $\text{Ag}_2\text{WO}_4$ -TA (B),  $\alpha$ - $\text{Ag}_2\text{WO}_4$ -BA (C), and  $\alpha$ - $\text{Ag}_2\text{WO}_4$ -CA (D) samples.

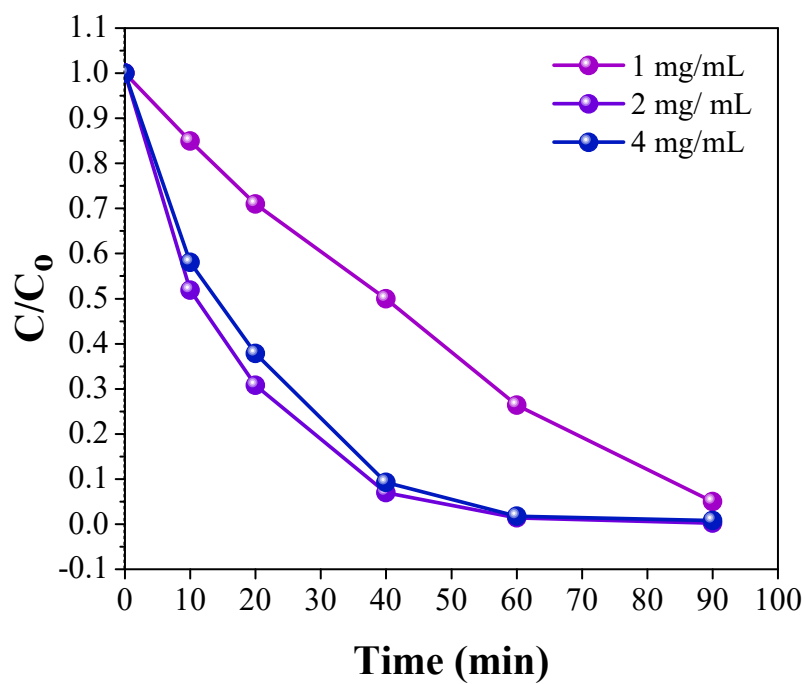

**Figure S8.** Photocatalytic RhB degradation profiles using the  $\alpha$ - $\text{Ag}_2\text{WO}_4$ -CA at different concentrations.



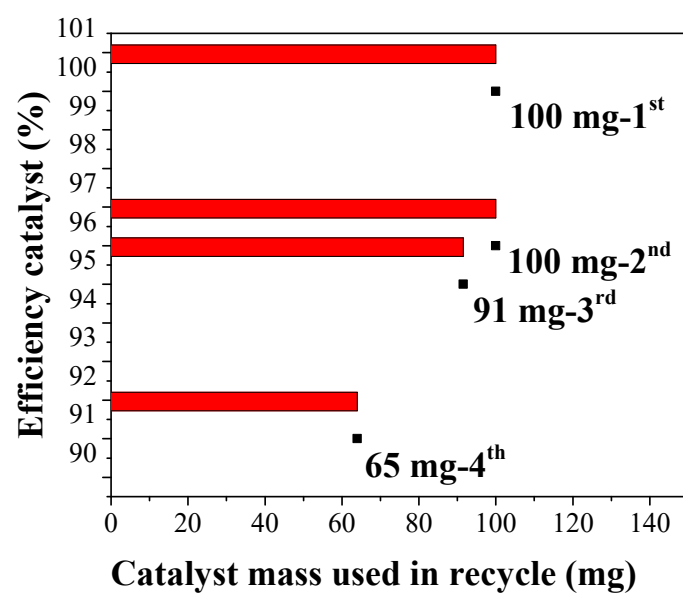

**Figure S9.** Relationship between loss of mass of the  $\alpha$ -Ag<sub>2</sub>WO<sub>4</sub>-CA and degradation efficiency during the catalytic cycles.
